# Supplementary material for: Comparing Deterministic and Stochastic Methods in Geospatial Analysis of Groundwater Fluoride Concentration
Source: MDPI journal article supplement (doi:10.3390/w15091707), 2023-04-27
Supplement: s1 [file s1]

Archive with 1 entries (1 files):
- water-2362516-supplementary.pdf
