# Supplementary material for: Comparing Deterministic and Stochastic Methods in Geospatial Analysis of Groundwater Fluoride Concentration
Source: MDPI journal article supplement (doi:10.3390/w15091707), 2023-04-27
Supplement: s1 [file s1 › water-2362516-supplementary.pdf]

## Supplementary material

Table S1 Area covered by different aquifer types in Tamil Nadu (CGWB, 2012)

Figure S1: Scatter plots of measured and predicted fluoride by LOOCV

Figure S2: Scatter plots of measured and predicted fluoride by hold-out validation

Figure S3: Scatter plots of measured and predicted fluoride by validation with an independent dataset

Figure S4: Residual histograms for various aquifer types by IDW interpolation

Figure S5: Residual histograms for various aquifer types by LPI.

Table S1 Area covered by different aquifer types in Tamil Nadu (CGWB, 2012)

| <b>Aquifer type</b>     | <b>Total area (%)</b> |
|-------------------------|-----------------------|
| Alluvium                | 17.54                 |
| Laterite                | 1.85                  |
| Sandstone               | 6.26                  |
| Shale                   | 0.19                  |
| Limestone               | 0.05                  |
| Granite                 | 1.14                  |
| Schist                  | 0.25                  |
| Quartzite               | 0.02                  |
| Charnockite             | 25.65                 |
| Khondalite              | 1.52                  |
| Banded Gneissic Complex | 7.86                  |
| Gneiss                  | 37.22                 |
| Intrusives              | 0.39                  |

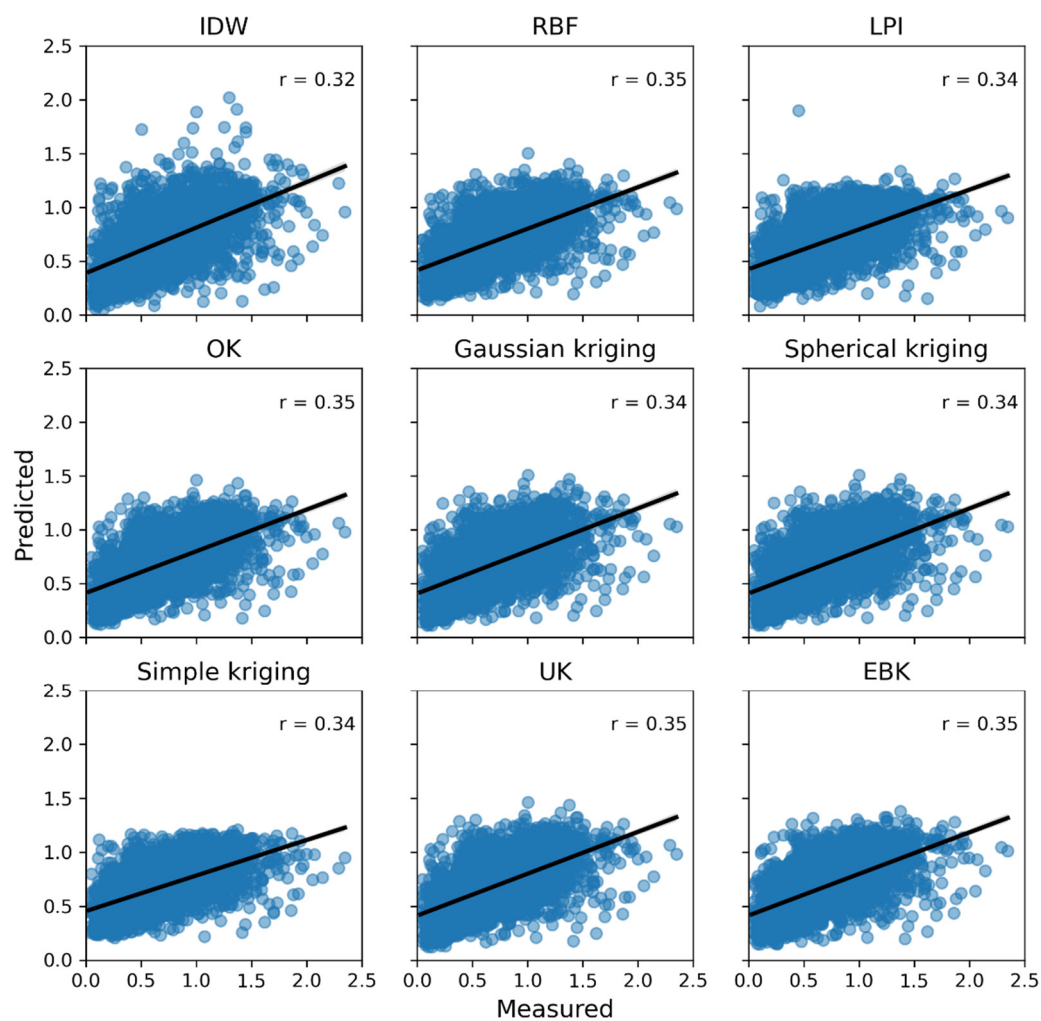

Figure S1 Scatter plots of measured and predicted fluoride by LOOCV

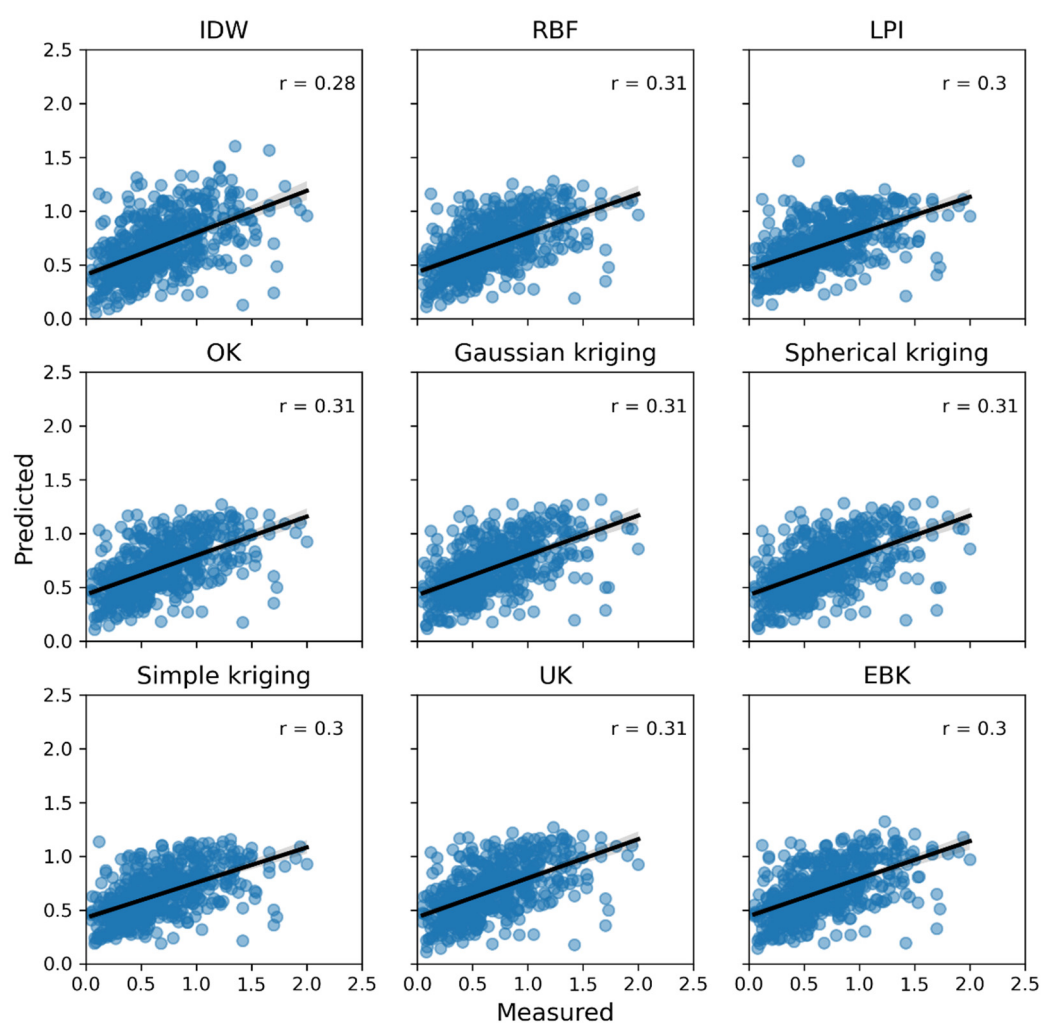

Figure S2 Scatter plots of measured and predicted fluoride by hold-out validation

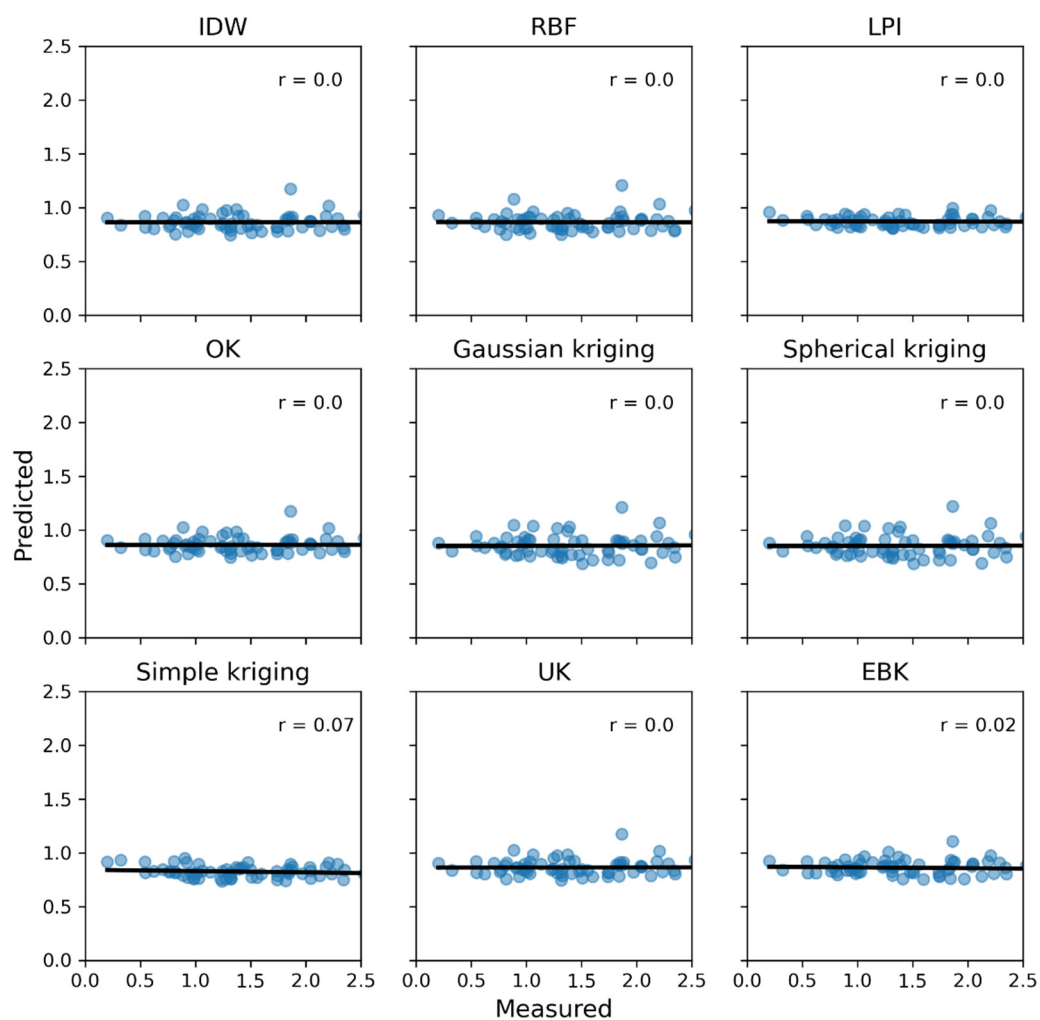

Figure S3 Scatter plots of measured and predicted fluoride by validation with an independent dataset

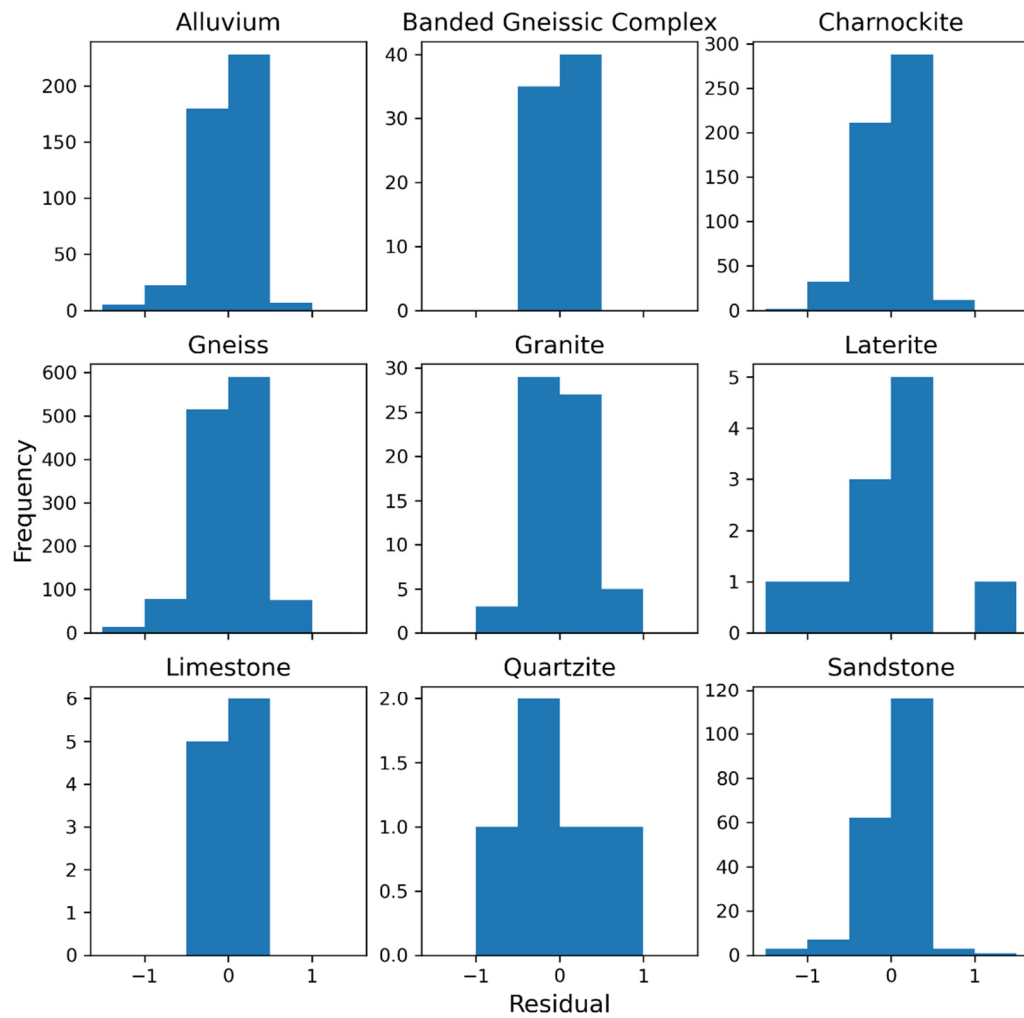

Figure S4 Residual histograms for various aquifer types by IDW interpolation

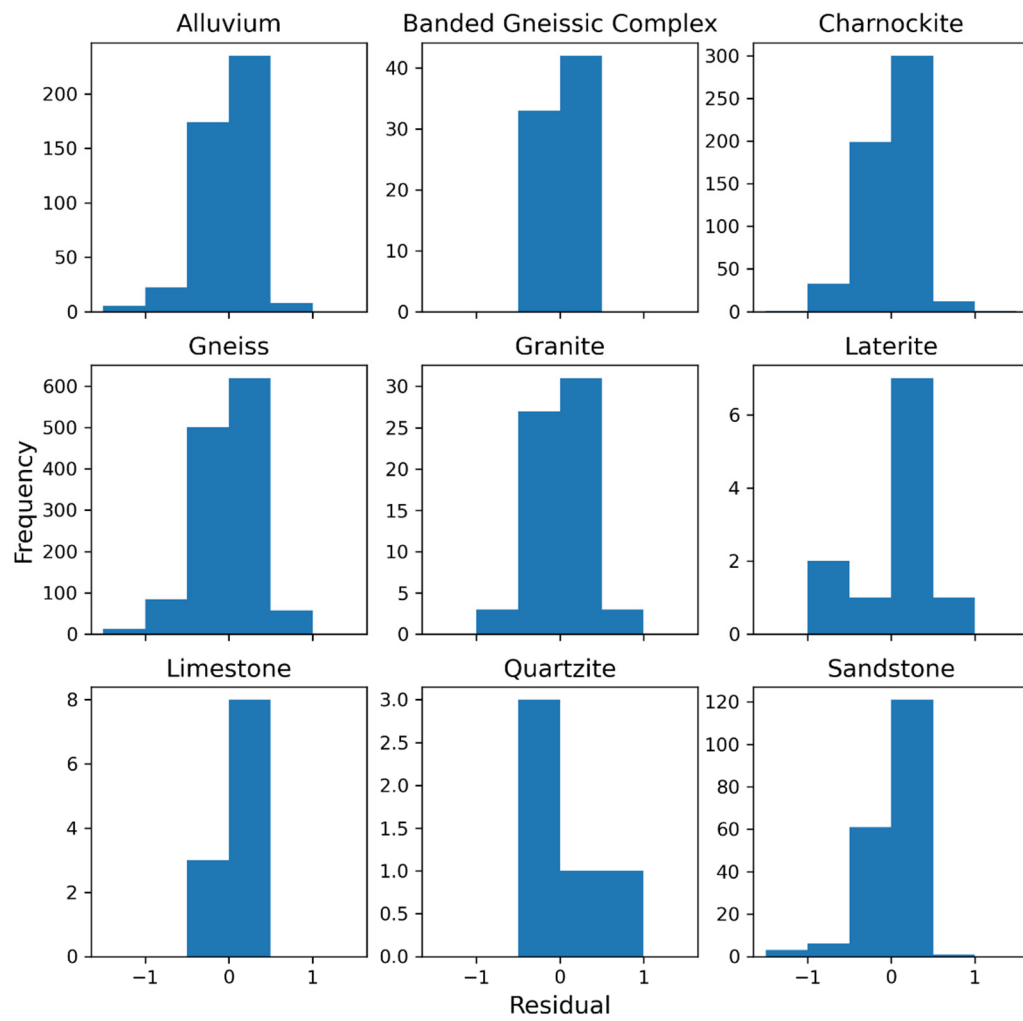

Figure S5 Residual histograms for various aquifer types by LPI
